# Supplementary material
Source: PubMed Central journal article supplement (PMC2917524)
Supplement: NIHMS213903-supplement-01.pdf [file NIHMS213903-supplement-01.pdf]

| Acid Lipase Gene               | Chromosome<br>Coordinates                    | Gene<br>Size | Coding<br>Exons | Subunit<br>MW | Amino<br>Acids | pI           | Ensembl Protein<br>Prediction   | Ref Seq ID<br><sup>1</sup> NCBI Reference<br><sup>2</sup> NCBI Predicted<br><sup>3</sup> BLAT Predicted |
|--------------------------------|----------------------------------------------|--------------|-----------------|---------------|----------------|--------------|---------------------------------|---------------------------------------------------------------------------------------------------------|
| <b>Chimpanzee</b>              | <b>Chromosome 10</b>                         |              |                 |               |                |              |                                 |                                                                                                         |
| <b><i>Pons troglodytes</i></b> | <b>Gene order: J-F-K-N-M-A</b>               |              |                 |               |                |              |                                 |                                                                                                         |
| <i>LIPA</i>                    | 89,482,403-89,515,834                        | 33,432       | 9 -ve           | 45,419        | 399            | 6.4          | ENSPTRT00000005165              | XP_521552 <sup>1</sup>                                                                                  |
| <i>LIPF</i>                    | 88,917,921-88,929,291                        | 11,371       | 9 +ve           | 45,300        | 398            | 6.6          | ENSPTRT00000005140              | XP_521545 <sup>1</sup>                                                                                  |
| <i>LIPJ</i>                    | 88,837,829-88,854,222                        | 16,394       | 9 +ve           | 42,383        | 366            | 6.1          | ENSPTRT00000057646              | XP_507899 <sup>1</sup>                                                                                  |
| <i>LIPK</i>                    | 88,976,758-89,008,956                        | 32,199       | 9 +ve           | 45,544        | 399            | 8.1          | ENSPTRT00000057645              | XP_001138639 <sup>1</sup>                                                                               |
| <i>LIPM</i>                    | 89,063,462-89,081,035                        | 17,574       | 9 +ve           | 48,277        | 423            | 6.6          | ENSPTRT00000005143              | XP_001138977 <sup>1</sup>                                                                               |
| <i>LIPN</i>                    | 89,017,601-89,034,648                        | 17,048       | 9 +ve           | 45,559        | 398            | 6.4          | ENSPTRT00000057644              | XP_521546 <sup>1</sup>                                                                                  |
| <b>Orangutan</b>               | <b>Chromosome 10</b>                         |              |                 |               |                |              |                                 |                                                                                                         |
| <b><i>Pongo abelii</i></b>     | <b>Gene order: N-K-F-J-M-A</b>               |              |                 |               |                |              |                                 |                                                                                                         |
| <i>LIPA</i>                    | 87,901,737-87,934,555                        | 32,819       | 9 (-ve)         | 45,452        | 399            | 6.4          | ENSPPYT00000002953              | <sup>3</sup> chr10.569.1                                                                                |
| <i>LIPF</i>                    | 85,710,697-85,722,068                        | 11,372       | 9 (-ve)         | 45,240        | 398            | 7.2          | ENSPPYT00000002935              | <sup>3</sup> chr10.550.1                                                                                |
| <i>LIPJ</i>                    | 85,796,879-85,816,972                        | 20,094       | 9 (-ve)         | 42,239        | 366            | 6.1          |                                 | <sup>5</sup>                                                                                            |
| <i>LIPK</i>                    | 85,629,181-85,658,714                        | 29,534       | 9 (-ve)         | 45,550        | 399            | 8.4          | ENSPPYT00000002934              | <sup>3</sup> chr10.549.1                                                                                |
| <i>LIPM</i>                    | 87,474,905-87,491,040                        | 16,136       | 9 (+ve)         | 48,275        | 423            | 6.6          | <sup>5</sup> ENSPPYT00000002946 | <sup>3</sup> chr10.562.1                                                                                |
| <i>LIPN</i>                    | 85,606,251-85,620,533                        | 14,283       | 9 (-ve)         | 45,608        | 398            | 6.5          | <sup>5</sup> ENSPPYT00000002933 | <sup>5</sup>                                                                                            |
| <b>Rhesus Monkey</b>           | <b>Chromosome 9</b>                          |              |                 |               |                |              |                                 |                                                                                                         |
| <b><i>Macaca mulatta</i></b>   | <b>Gene order: J-F-K-N-M-A</b>               |              |                 |               |                |              |                                 |                                                                                                         |
| <i>LIPA</i>                    | 88,805,255-88,839,453                        | 34,199       | 9 (-ve)         | 45,480        | 399            | 6.4          |                                 | <sup>2</sup> XP_001085160                                                                               |
| <i>LIPF</i>                    | 88,247,613-88,258,640                        | 11,028       | 9 (+ve)         | 44,318        | 392            | 5.9          |                                 | <sup>2</sup> XP_001082289                                                                               |
| <i>LIPJ</i>                    | 88,180,349-88,199,904                        | 19,556       | 9 (+ve)         | 46,385        | 391            | 6.3          |                                 | <sup>2</sup> XP_001082167                                                                               |
| <i>LIPK</i>                    | 88,298,630-88,329,151                        | 30,522       | 9 (+ve)         | 46,506        | 399            | 8.9          |                                 | <sup>2</sup> XP_001082335                                                                               |
| <i>LIPM</i>                    | 88,379,173-88,396,837                        | 17,665       | 9 (+ve)         | 48,303        | 423            | 6.5          |                                 | <sup>3</sup>                                                                                            |
| <i>LIPN</i>                    | 88,337,780-88,353,937                        | 16,158       | 9 (+ve)         | 45,651        | 398            | 6.4          |                                 | <sup>3</sup>                                                                                            |
| <b>Cow</b>                     | <b>Chromosome 26</b>                         |              |                 |               |                |              |                                 |                                                                                                         |
| <b><i>Bos taurus</i></b>       | <b>Gene order: J-F-K-M-A <sup>4</sup>[N]</b> |              |                 |               |                |              |                                 |                                                                                                         |
| <i>LIPA</i>                    | 11,348,494-11,390,918                        | 42,425       | 9 (-ve)         | 45,671        | 399            | 7.2          | BC146075 (GenBank ID)           | <sup>2</sup> NP_001096793                                                                               |
| <i>LIPF</i>                    | 10,779,450-10,793,506                        | 14,047       | 9 (+ve)         | 45,194        | 397            | 6.5          | ENSBTAT00000008453              | NM_174103                                                                                               |
| <i>LIPJ</i>                    | 10,632,628-10,651,794                        | 19,167       | 9 (+ve)         | 45,574        | 398            | 8.3          | ENSBTAT00000049487              | <sup>2</sup> XP_593347                                                                                  |
| <i>LIPK</i>                    | 10,849,060-10,866,363                        | 17,304       | 9 (+ve)         | 45,453        | 396            | 8.8          | ENSBTAT00000017773              | <sup>2</sup> XP_584217                                                                                  |
| <i>LIPM</i>                    | 10,937,349-10,957,185                        | 19,837       | 9 (+ve)         | 48,505        | 423            | 8.3          | ENSBTAT00000017778              | <sup>2</sup> XP_595458                                                                                  |
| <i>LIPN</i>                    | <sup>4</sup> 558-19,395 Unknown              | 34,223       | <sup>4</sup>    | <sup>4</sup>  | <sup>4</sup>   | <sup>4</sup> | <sup>4</sup> ENSBTAT00000034704 | <sup>2</sup> XP_602277                                                                                  |
| <b>Horse</b>                   | <b>Chromosome 1</b>                          |              |                 |               |                |              |                                 |                                                                                                         |

|                                |                                  |        |         |        |     |     |                    |                           |  |
|--------------------------------|----------------------------------|--------|---------|--------|-----|-----|--------------------|---------------------------|--|
| <b><i>Equus caballus</i></b>   | <b>Gene order: A-M-N-K-F-J</b>   |        |         |        |     |     |                    |                           |  |
| <b>LIPA</b>                    | 39,069,159-39,103,381            | 34,223 | 9 (+ve) | 45,327 | 409 | 7.3 | ENSECAT00000011488 | <sup>2</sup> XP_001503012 |  |
| <b>LIPF</b>                    | 39,769,658-39,780,294            | 10,637 | 9 (+ve) | 45,214 | 398 | 7.7 | ENSECAT00000010632 | <sup>2</sup> XP_001503148 |  |
| <b>LIPJ</b>                    | 39,936,554-39,961,057            | 24,504 | 9 (-ve) | 45,756 | 398 | 7.2 | ENSECAT00000015158 | <sup>2</sup> XP_001501589 |  |
| <b>LIPK</b>                    | 39,588,872-39,619,886            | 31,015 | 9 (-ve) | 45,666 | 399 | 8.8 | ENSECAT00000007415 | <sup>2</sup> XP_001503125 |  |
| <b>LIPM</b>                    | 39,498,465-39,519,901            | 21,437 | 9 (-ve) | 48,099 | 423 | 6.8 | ENSECAT00000024102 | <sup>2</sup> XP_001501533 |  |
| <b>LIPN</b>                    | 39,546,866-39,573,950            | 27,085 | 9 (-ve) | 45,649 | 400 | 6.6 | ENSECAT00000006452 | <sup>2</sup> XP_001501541 |  |
| <b>Dog</b>                     | <b>Chromosome 26</b>             |        |         |        |     |     |                    |                           |  |
| <b><i>Canis familiaris</i></b> | <b>Gene order: J-F-K-N-M-A</b>   |        |         |        |     |     |                    |                           |  |
| <b>LIPA</b>                    | 41,958,963-41,981,595            | 22,633 | 9 (-ve) | 45,063 | 398 | 6.7 | ENSCAFT00000035174 | <sup>2</sup> XP_853280    |  |
| <b>LIPF</b>                    | 41,541,401-41,555,137            | 17,737 | 9 (+ve) | 45,103 | 398 | 6.3 | ENSCAFT00000024834 | <sup>2</sup> NP_001003209 |  |
| <b>LIPJ [LIPL1]</b>            | 41,497,356-41,509,775            | 12,420 | 9 (+ve) | 41,703 | 365 | 6.6 | ENSCAFT00000036576 | <sup>2</sup> XP_534779    |  |
| <b>LIPK</b>                    | 41,602,751-41,625,548            | 22,798 | 9 (+ve) | 46,233 | 400 | 8.7 | ENSCAFT00000036401 | <sup>2</sup> XP_543591    |  |
| <b>LIPM</b>                    | 41,677,108-41,690,970            | 13,863 | 9 (+ve) | 48,797 | 430 | 7.7 | ENSCAFT00000036170 | <sup>2</sup> XP_853107    |  |
| <b>LIPN</b>                    | 41,643,262-41,656,521            | 13,265 | 9 (+ve) | 45,239 | 400 | 8.8 | ENSCAFT00000036272 | <sup>3</sup>              |  |
| <b>Guinea Pig</b>              | <b>Scaffold 15</b>               |        |         |        |     |     |                    |                           |  |
| <b><i>Cavia porcellus</i></b>  | <b>Gene order: F-K-N-M-A [J]</b> |        |         |        |     |     |                    |                           |  |
| <b>LIPA</b>                    | 1,783,523-1,816,987              | 33,465 | 9 (-ve) | 45,053 | 399 | 8.8 | ENSCPOT0000000968  | <sup>3</sup> sc15.016.1   |  |
| <b>LIPF</b>                    | 1,254,927-1,269,927              | 15,001 | 9 (+ve) | 45,087 | 398 | 6.1 | ENSCPOT00000007411 | <sup>3</sup> sc15.009.1   |  |
| <b>LIPK</b>                    | 1,297,088-1,309,813              | 12,726 | 9 (+ve) | 45,540 | 397 | 8.8 | ENSCPOT00000007417 |                           |  |
| <b>LIPM</b>                    | 1,360,852-1,377,384              | 16,533 | 9 (+ve) | 45,061 | 396 | 6.5 | ENSCPOT00000001668 | <sup>3</sup> sc15.010.1   |  |
| <b>LIPN</b>                    | 1,327,922-1,340,779              | 12,858 | 9 (+ve) | 45,765 | 398 | 6.4 | ENSCPOT00000007424 |                           |  |
